# Supplementary material for: Evaluation of Arthrobacter aurescens Strain TC1 as Bioaugmentation Bacterium in Soils Contaminated with the Herbicidal Substance Terbuthylazine
Source: PubMed Central journal article supplement (PMC4684385; doi:10.1371/journal.pone.0144978), 2015-12-14
Supplement: pone.0144978.s001.pdf [file pone.0144978.s001.pdf]

## S1 File. Total culturable bacteria units in the soil microcosms during the bioremediation experiments

Data of total colony forming units (cfu) counted in the non-bioaugmented soil indicate the soil microcosms support considerable numbers of indigenous bacteria ( $1.6 \pm 0.6 \times 10^8$  total cfu  $g^{-1}$  of soil, in average) (Figure below). Comparisons of total cfu numbers between the bioaugmented and the non-bioaugmented soil microcosms indicate the presence of viable cells of the bioaugmentation bacterium during up to 14 days of the bioremediation treatments but a decline in their numbers from day one/three onwards (Figure below).

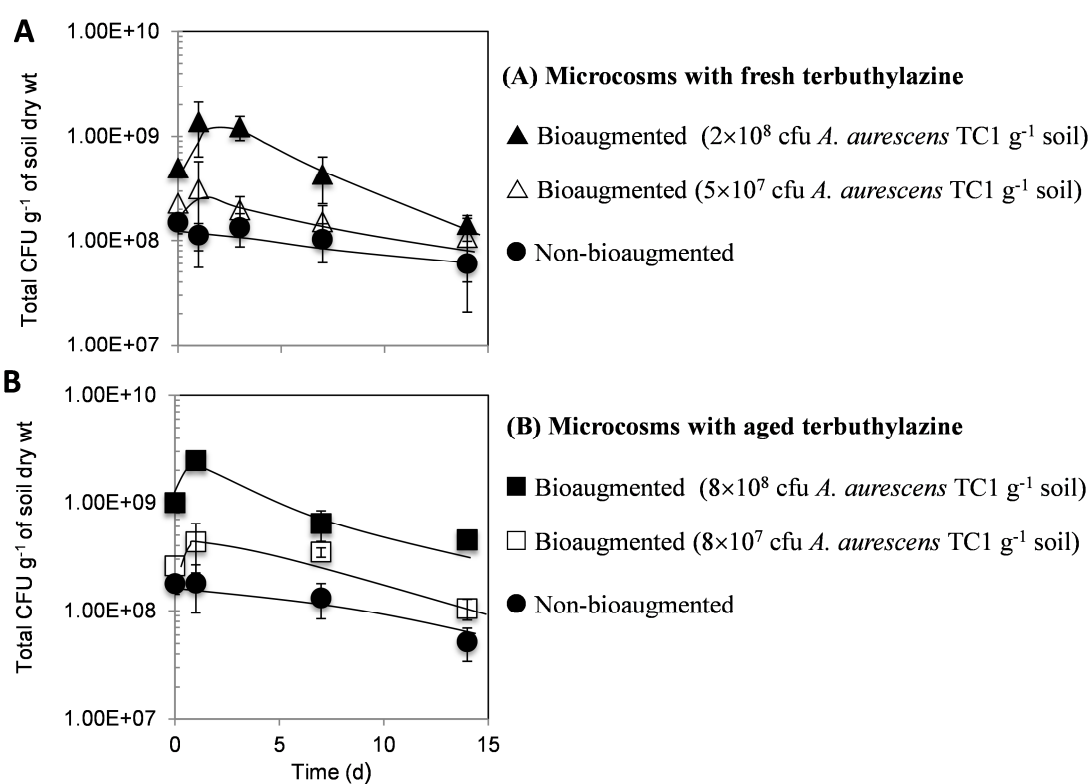

**Fig. Total culturable bacteria units in the soil microcosms during the bioremediation experiments.** Time-course (in days, d) variation of total colony forming units (cfu) counted (using agarized LB medium) in the soil microcosms contaminated with (A) fresh or (B) four month-aged Terbutilazina-Sapex ( $10 \times$  the recommended field dose) and bioaugmented (at day zero) with viable cells of *A. aureescens* TC1 at the indicated initial inoculum densities. Total cfu  $g^{-1}$  of soil counted in the non-bioaugmented soil is also shown for comparison. Error bars represent  $\pm 1$  standard deviation.
